# Supplementary material
Source: PubMed Central journal article supplement (PMC4216562)
Supplement: NIHMS637271-supplement-Supplement.pdf [file NIHMS637271-supplement-Supplement.pdf]

## **SUPPLEMENTARY FIGURES AND TABLES**

### **Isolation and Characterization of Human Osteoblasts From Needle Biopsies**

#### **Without *In Vitro* Culture**

#### **Osteoporosis International**

Koji Fujita, Matthew M. Roforth, Elizabeth J. Atkinson, James M. Peterson, Salman Kirmani, Matthew T. Drake, Louise K. McCreedy, Joshua N. Farr, David G. Monroe, Sundeep Khosla

College of Medicine, Mayo Clinic, Rochester, MN, USA

**Corresponding author:** Sundeep Khosla, M.D., Endocrine Research Unit, Guggenheim 7-11, Mayo Clinic, 200 First Street SW, Rochester, MN 55905. Phone: (507) 255-6663, Fax: (507) 293-3853, E-mail: [khosla.sundeep@mayo.edu](mailto:khosla.sundeep@mayo.edu)

# Supplementary Figure 1

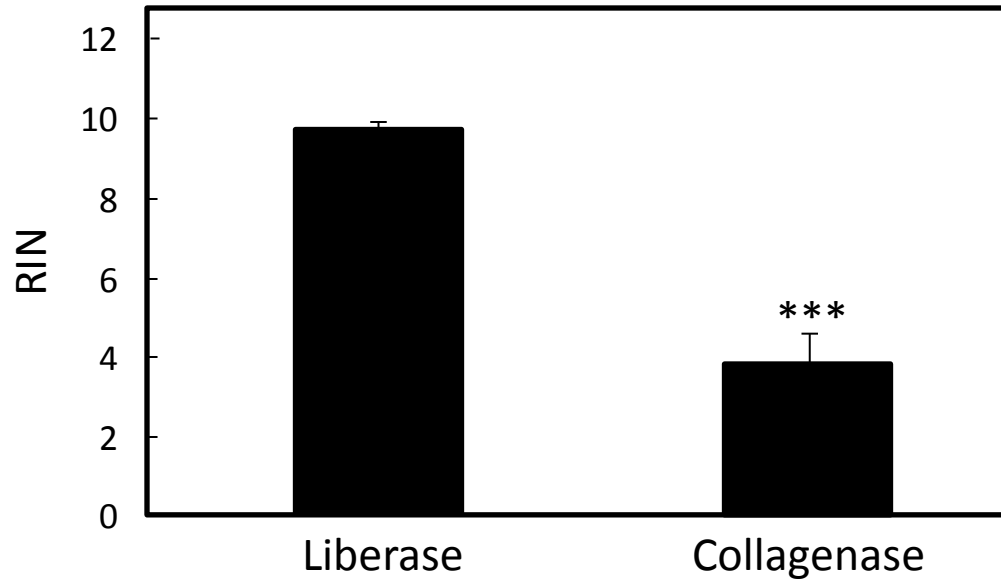

Supplementary Figure 1. RNA integrity (RIN) values of second digest cells using the Liberase or standard collagenase. \*\*\*P < 0.001

## Supplementary Figure 2

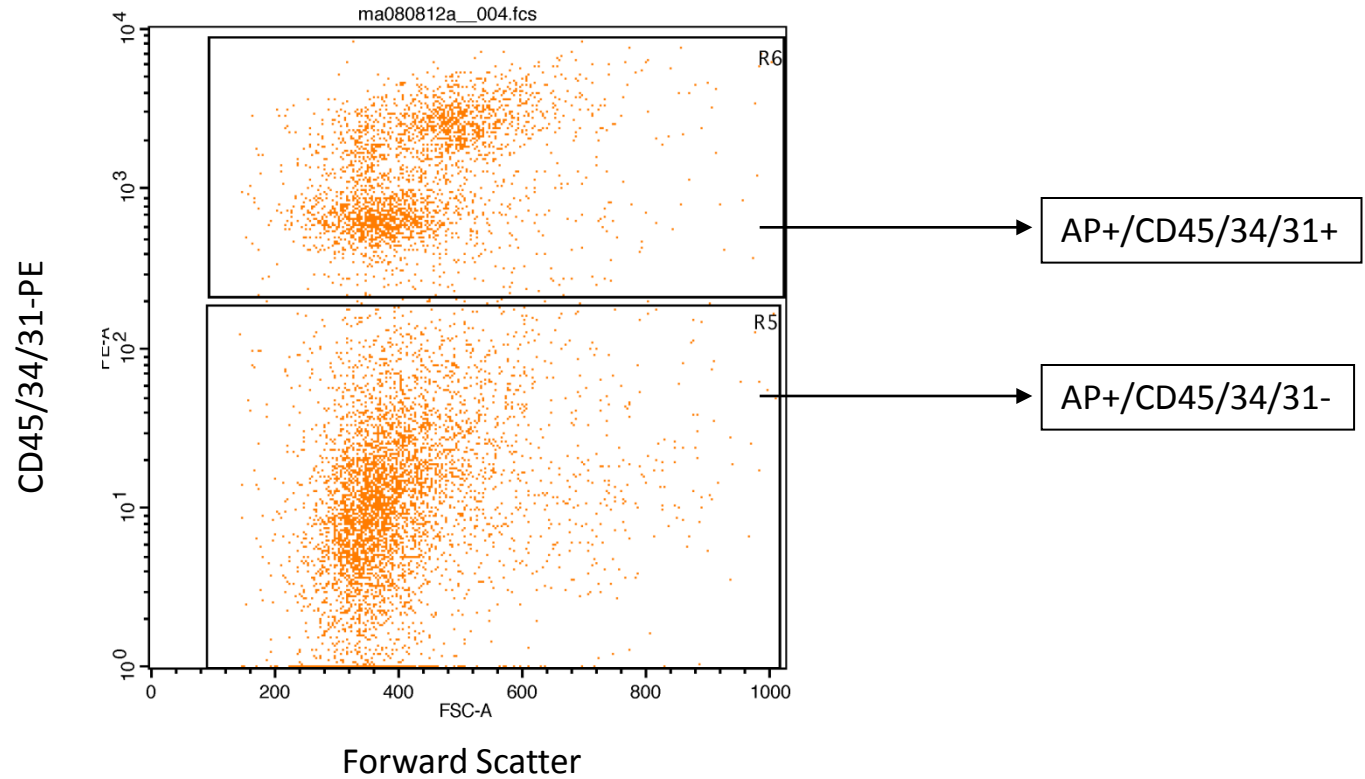

Supplementary Figure 2. Flow cytometry analysis of AP+ cells stained with a cocktail of antibodies to CD45, 34, and 31.

### Supplementary Figure 3

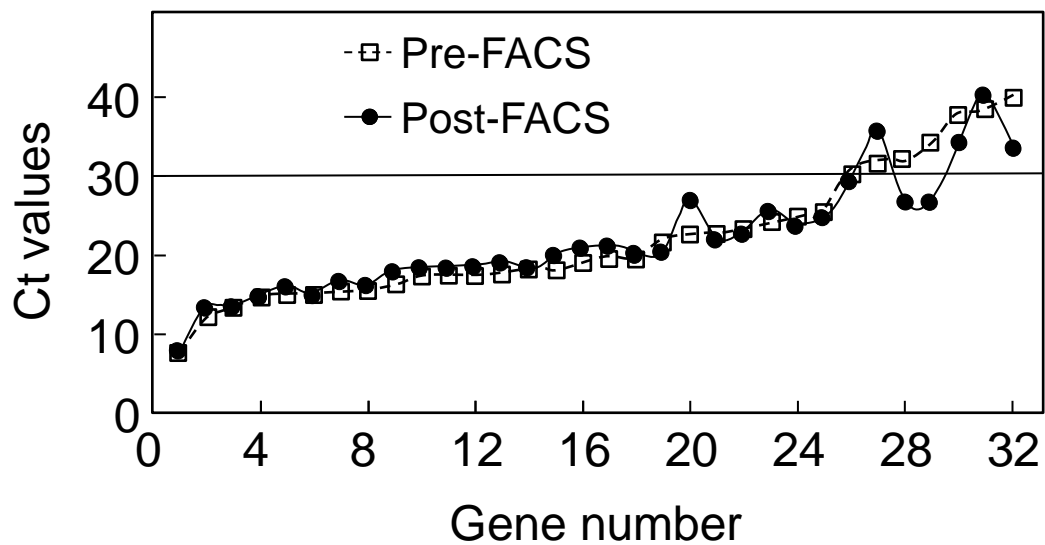

Supplementary Figure 3. Cycle threshold (Ct) values of 32 genes in AP+ cells before and following FACS sorting. \*\*

**Supplementary Table 1.** List of genes expressed in AP+/CD45/34/31- cells but not in fibroblasts (p < 0.05; q < 0.05)

|                   |                  |                 |                 |                |                  |                 |                     |                |                 |                   |                 |                 |                |
|-------------------|------------------|-----------------|-----------------|----------------|------------------|-----------------|---------------------|----------------|-----------------|-------------------|-----------------|-----------------|----------------|
| <i>ABCB5</i>      | <i>BTK</i>       | <i>CHAD</i>     | <i>CYP4X1</i>   | <i>FMO6P</i>   | <i>HBQ1</i>      | <i>ISG20</i>    | <i>LILRB2</i>       | <i>MIR3128</i> | <i>NUP210</i>   | <i>PLVAP</i>      | <i>RNF43</i>    | <i>SLFN14</i>   | <i>TMPRSS4</i> |
| <i>ABCC13</i>     | <i>C10orf81</i>  | <i>CHI3L2</i>   | <i>CYSLTR2</i>  | <i>FOXD4L1</i> | <i>HBZ</i>       | <i>ITGA2B</i>   | <i>LMOD2</i>        | <i>MIR4486</i> | <i>NUP62CL</i>  | <i>PLXDC2</i>     | <i>ROR2</i>     | <i>SLPI</i>     | <i>TMPRSS5</i> |
| <i>ACHE</i>       | <i>C11orf21</i>  | <i>CHL1</i>     | <i>DARC</i>     | <i>FPR1</i>    | <i>HEPACAM2</i>  | <i>ITGAM</i>    | <i>LOC100130899</i> | <i>MIR451A</i> | <i>NXPH2</i>    | <i>PON3</i>       | <i>RUNDC3A</i>  | <i>SMOC1</i>    | <i>TNFSF11</i> |
| <i>ACSM1</i>      | <i>C11orf92</i>  | <i>CHMP4C</i>   | <i>DEFA4</i>    | <i>FUT1</i>    | <i>HIST1H1T</i>  | <i>ITGB2</i>    | <i>LOC100131096</i> | <i>MIR4678</i> | <i>OLFM4</i>    | <i>POU2AF1</i>    | <i>S100A12</i>  | <i>SMOC2</i>    | <i>TREM1</i>   |
| <i>ACSM5</i>      | <i>C17orf109</i> | <i>CHRNB4</i>   | <i>DIO3</i>     | <i>FXYP6</i>   | <i>HIST1H2AB</i> | <i>ITLN1</i>    | <i>LOC100506497</i> | <i>MIR4732</i> | <i>OR10Z1</i>   | <i>POU6F2</i>     | <i>S100A8</i>   | <i>SNORD96B</i> | <i>TREML2</i>  |
| <i>ADAMTS17</i>   | <i>C17orf47</i>  | <i>CLC</i>      | <i>DIO3OS</i>   | <i>GALNT8</i>  | <i>HIST1H2AD</i> | <i>IZUMO1</i>   | <i>LOC100507351</i> | <i>MKRN9P</i>  | <i>OR2T8</i>    | <i>PPT2-EGFL8</i> | <i>S100A9</i>   | <i>SP7</i>      | <i>TRIM15</i>  |
| <i>ADIPOQ</i>     | <i>C17orf99</i>  | <i>CLEC4C</i>   | <i>DLX5</i>     | <i>GATA1</i>   | <i>HIST1H2BJ</i> | <i>KBTBD12</i>  | <i>LOC100507387</i> | <i>MLC1</i>    | <i>OR2W3</i>    | <i>PRG2</i>       | <i>SAMD7</i>    | <i>SPATA9</i>   | <i>TRIM40</i>  |
| <i>ADRB1</i>      | <i>C19orf77</i>  | <i>CLEC4E</i>   | <i>DLX6</i>     | <i>GCHFR</i>   | <i>HIST1H3A</i>  | <i>KCNE3</i>    | <i>LOC254559</i>    | <i>MMP13</i>   | <i>OR51B4</i>   | <i>PRKCB</i>      | <i>SAMSN1</i>   | <i>SPN</i>      | <i>TRPV5</i>   |
| <i>AHSP</i>       | <i>C1orf105</i>  | <i>CMKLR1</i>   | <i>DLX6-AS1</i> | <i>GCNT2</i>   | <i>HIST1H3D</i>  | <i>KCNH2</i>    | <i>LOC340074</i>    | <i>MMP28</i>   | <i>OR51V1</i>   | <i>PRKCQ</i>      | <i>SCARA5</i>   | <i>SPTB</i>     | <i>TSPAN11</i> |
| <i>AIF1</i>       | <i>C2orf40</i>   | <i>CNTFR</i>    | <i>DMP1</i>     | <i>GDF10</i>   | <i>HIST1H3H</i>  | <i>KCNK17</i>   | <i>LOC400680</i>    | <i>MMRN1</i>   | <i>OR52A5</i>   | <i>PROK2</i>      | <i>SCARF1</i>   | <i>ST6GAL2</i>  | <i>TSPAN32</i> |
| <i>ALOX15B</i>    | <i>C2orf48</i>   | <i>CNTNAP2</i>  | <i>DNASE1L3</i> | <i>GF11B</i>   | <i>HIST1H4A</i>  | <i>KCNK5</i>    | <i>LOC644248</i>    | <i>MNDA</i>    | <i>P2RY12</i>   | <i>PTH1R</i>      | <i>SCARNA20</i> | <i>ST8SIA6</i>  | <i>TSPAN7</i>  |
| <i>ALOX5AP</i>    | <i>C4orf45</i>   | <i>COL6A4P2</i> | <i>DPEP2</i>    | <i>GIMAP4</i>  | <i>HIST1H4F</i>  | <i>KCNQ4</i>    | <i>LOC728228</i>    | <i>MPO</i>     | <i>P2RY13</i>   | <i>PTH2R</i>      | <i>SCARNA22</i> | <i>STXBP2</i>   | <i>TSPAN8</i>  |
| <i>AMBP</i>       | <i>C5AR1</i>     | <i>COL6A5</i>   | <i>DUSP21</i>   | <i>GIMAP6</i>  | <i>HIST3H2BB</i> | <i>KEL</i>      | <i>LOC729041</i>    | <i>MS4A3</i>   | <i>PAGE1</i>    | <i>PTPN7</i>      | <i>SCARNA8</i>  | <i>SULT1A1</i>  | <i>TSPO2</i>   |
| <i>AMICA1</i>     | <i>C7</i>        | <i>CPB1</i>     | <i>ELF5</i>     | <i>GIMAP8</i>  | <i>HMGCLL1</i>   | <i>KIAA0748</i> | <i>LOC730227</i>    | <i>MS4A7</i>   | <i>PAGE2B</i>   | <i>PTPRT</i>      | <i>SCUBE1</i>   | <i>SULT1C4</i>  | <i>TULP2</i>   |
| <i>ANKRD36BP2</i> | <i>C7orf29</i>   | <i>CPN2</i>     | <i>ELMO3</i>    | <i>GLOD5</i>   | <i>HOOK1</i>     | <i>KIAA1257</i> | <i>LONRF2</i>       | <i>MYL4</i>    | <i>PAK6</i>     | <i>RAB11FIP4</i>  | <i>SDC4P</i>    | <i>SYK</i>      | <i>TYROBP</i>  |
| <i>APLN</i>       | <i>C7orf34</i>   | <i>CPVL</i>     | <i>EMID1</i>    | <i>GNA15</i>   | <i>HP</i>        | <i>KIAA1274</i> | <i>LPL</i>          | <i>MYO16</i>   | <i>PAQR9</i>    | <i>RARRES2</i>    | <i>SEC14L3</i>  | <i>SYP</i>      | <i>UBD</i>     |
| <i>APOB</i>       | <i>CA10</i>      | <i>CPXM1</i>    | <i>EPB42</i>    | <i>GPHA2</i>   | <i>HRASLS5</i>   | <i>KIAA1875</i> | <i>LAMP</i>         | <i>MYO1A</i>   | <i>PCDH1</i>    | <i>RASGEF1B</i>   | <i>SEC14L4</i>  | <i>TAL1</i>     | <i>UBXN10</i>  |
| <i>APOBR</i>      | <i>CA3</i>       | <i>CR1</i>      | <i>EPB49</i>    | <i>GPLD1</i>   | <i>HSF5</i>      | <i>KIF21B</i>   | <i>LRRN2</i>        | <i>MYT1</i>    | <i>PCDH20</i>   | <i>RASIP1</i>     | <i>SEMA6B</i>   | <i>TAS2R39</i>  | <i>UCA1</i>    |
| <i>APOE</i>       | <i>CACNA1I</i>   | <i>CR1L</i>     | <i>ESPN</i>     | <i>GPR15</i>   | <i>HSH2D</i>     | <i>KIF26A</i>   | <i>LSP1</i>         | <i>MYZAP</i>   | <i>PCDHB12</i>  | <i>REM2</i>       | <i>SERPINA1</i> | <i>TEDDM1</i>   | <i>UMODL1</i>  |
| <i>ARHGEF37</i>   | <i>CADM3</i>     | <i>CR2</i>      | <i>EVPL</i>     | <i>GPR171</i>  | <i>HSPA6</i>     | <i>KLF1</i>     | <i>LTF</i>          | <i>NCKAP1L</i> | <i>PCK1</i>     | <i>RERG</i>       | <i>SFRP5</i>    | <i>TESC</i>     | <i>UNC13C</i>  |
| <i>ART4</i>       | <i>CBFA2T3</i>   | <i>CRB1</i>     | <i>F5</i>       | <i>GPR88</i>   | <i>HSPA7</i>     | <i>KLHDC8A</i>  | <i>LY9</i>          | <i>NDRG2</i>   | <i>PDZK1IP1</i> | <i>REXO1L1</i>    | <i>SHISA2</i>   | <i>TF</i>       | <i>UNC13D</i>  |
| <i>ASB15</i>      | <i>CBLN4</i>     | <i>CRH</i>      | <i>FAM124B</i>  | <i>GRAP2</i>   | <i>IBSP</i>      | <i>KLHL6</i>    | <i>LYL1</i>         | <i>NEURL3</i>  | <i>PDZRN4</i>   | <i>RFPL2</i>      | <i>SHISA7</i>   | <i>TFDP3</i>    | <i>UNC5CL</i>  |
| <i>ASB4</i>       | <i>CCBP2</i>     | <i>CRISP3</i>   | <i>FAM178B</i>  | <i>GRASP</i>   | <i>ICAM4</i>     | <i>KLK1</i>     | <i>MAL</i>          | <i>NFE2</i>    | <i>PHOSPHO1</i> | <i>RGS1</i>       | <i>SKAP1</i>    | <i>TFR2</i>     | <i>UPB1</i>    |
| <i>ATP1B2</i>     | <i>CCDC17</i>    | <i>CRISPLD1</i> | <i>FAM69C</i>   | <i>GYPB</i>    | <i>IFIT1B</i>    | <i>KLK4</i>     | <i>MAPK4</i>        | <i>NGFR</i>    | <i>PIK3AP1</i>  | <i>RGS18</i>      | <i>SLC16A10</i> | <i>THEGL</i>    | <i>VIPR1</i>   |
| <i>BEST3</i>      | <i>CCDC27</i>    | <i>CSF2RB</i>   | <i>FAM75C1</i>  | <i>GZMK</i>    | <i>IFITM4P</i>   | <i>KLK1P1</i>   | <i>MDF1</i>         | <i>NHLRC4</i>  | <i>PIK3CG</i>   | <i>RGS22</i>      | <i>SLC22A16</i> | <i>TIMD4</i>    | <i>VNN1</i>    |
| <i>BGLAP</i>      | <i>CCDC48</i>    | <i>CTSE</i>     | <i>FCAR</i>     | <i>HBA1</i>    | <i>IGF1</i>      | <i>KRT1</i>     | <i>MEPE</i>         | <i>NINJ2</i>   | <i>PIK3R5</i>   | <i>RGS6</i>       | <i>SLC27A2</i>  | <i>TLR2</i>     | <i>VSIG4</i>   |
| <i>BIN2</i>       | <i>CCDC88C</i>   | <i>CTSG</i>     | <i>FCGR3A</i>   | <i>HBA2</i>    | <i>IGF2</i>      | <i>KRT13</i>    | <i>MFNG</i>         | <i>NMNAT3</i>  | <i>PIP5K1B</i>  | <i>RHAG</i>       | <i>SLC30A10</i> | <i>TMC6</i>     | <i>WBSR17</i>  |
| <i>BMP5</i>       | <i>CD200</i>     | <i>CXCR2</i>    | <i>FCGR3B</i>   | <i>HBBP1</i>   | <i>IGLL5</i>     | <i>KRT222</i>   | <i>MFSD2B</i>       | <i>NMU</i>     | <i>PKHD1L1</i>  | <i>RHOH</i>       | <i>SLC36A2</i>  | <i>TMC8</i>     | <i>WDR72</i>   |
| <i>BMP8B</i>      | <i>CD244</i>     | <i>CXCR4</i>    | <i>FCN1</i>     | <i>HBE1</i>    | <i>IKZF1</i>     | <i>LBP</i>      | <i>MGAT3</i>        | <i>NPNT</i>    | <i>PKLR</i>     | <i>RIMS3</i>      | <i>SLC5A4</i>   | <i>TMEM132C</i> | <i>YBX2</i>    |
| <i>BPI</i>        | <i>CD5L</i>      | <i>CYBB</i>     | <i>FITM1</i>    | <i>HBG1</i>    | <i>IL2RG</i>     | <i>LCN2</i>     | <i>MIR142</i>       | <i>NRXN1</i>   | <i>PKMYT1</i>   | <i>RNASE1</i>     | <i>SLC6A1</i>   | <i>TMEM176A</i> | <i>ZBTB16</i>  |
| <i>BPIFB1</i>     | <i>CDH5</i>      | <i>CYP4F12</i>  | <i>FLJ39639</i> | <i>HBG2</i>    | <i>INPP5D</i>    | <i>LCP2</i>     | <i>MIR16-1</i>      | <i>NT5M</i>    | <i>PLEK</i>     | <i>RNASE3</i>     | <i>SLC7A10</i>  | <i>TMEM176B</i> | <i>ZFPM1</i>   |
| <i>BSPRY</i>      | <i>CEBPA</i>     | <i>CYP4F3</i>   | <i>FLJ40194</i> | <i>HBM</i>     | <i>IQA1</i>      | <i>LG14</i>     | <i>MIR25</i>        | <i>NTRK1</i>   | <i>PLIN1</i>    | <i>RNF175</i>     | <i>SLC8A3</i>   | <i>TMEM86B</i>  | <i>ZSCAN4</i>  |

**Supplementary Table 2. Ingenuity Pathway Analysis comparing genes in AP+/CD45/34/31- cells versus fibroblasts**

| Ingenuity Canonical Pathways                                                   | p-value  | Ratio  | Genes                                                                                         |
|--------------------------------------------------------------------------------|----------|--------|-----------------------------------------------------------------------------------------------|
| Natural Killer Cell Signaling                                                  | 0.000008 | 0.1080 | <i>FCGR3B,PRKCQ,PAK6,TYROBP,PIK3CG,SYK,CD244,PIK3R5,FCGR3A,INPP5D,LCP2,PRKCB</i>              |
| MSP-ROn Signaling Pathway                                                      | 0.000071 | 0.1490 | <i>TLR2,CSF2RB,ITGB2,KLK1,ITGAM,PIK3CG,PIK3R5</i>                                             |
| Leukocyte Extravasation Signaling                                              | 0.000162 | 0.0714 | <i>PRKCQ,SPN,MMP28,CXCR4,PIK3R5,MMP13,RHOH,BTK,ITGB2,ITGAM,CDH5,PIK3CG,CYBB,PRKCB</i>         |
| Production of Nitric Oxide and Reactive Oxygen Species in Macrophages          | 0.000275 | 0.0699 | <i>APOE,APOB,PRKCQ,PIK3R5,RHOH,TLR2,MPO,NGFR,PIK3CG,CYBB,SERPINA1,S100A8,PRKCB</i>            |
| LXR/RXR Activation                                                             | 0.000501 | 0.0794 | <i>APOE,APOB,TF,NGFR,LPL,AMBIP,SERPINA1,S100A8,LBP,PON3</i>                                   |
| Fc Epsilon RI Signaling                                                        | 0.000955 | 0.0811 | <i>BTK,PRKCQ,GRAP2,PIK3CG,SYK,PIK3R5,INPP5D,LCP2,PRKCB</i>                                    |
| Growth Hormone Signaling                                                       | 0.000955 | 0.0986 | <i>IGF2,PRKCQ,IGF1,PIK3CG,CEBPA,PIK3R5,PRKCB</i>                                              |
| IL-8 Signaling                                                                 | 0.001148 | 0.0625 | <i>ITGB2,ITGAM,PRKCQ,MPO,CXCR2,PIK3CG,GPLD1,PIK3R5,CYBB,RHOH,CR2,PRKCB</i>                    |
| Fcγ Receptor-mediated Phagocytosis in Macrophages and Monocytes                | 0.001380 | 0.0842 | <i>PRKCQ,PIK3CG,SYK,GPLD1,FCGR3A,INPP5D,LCP2,PRKCB</i>                                        |
| Atherosclerosis Signaling                                                      | 0.001862 | 0.0687 | <i>ITGB2,APOE,APOB,ALOX15B,CXCR4,LPL,MMP13,SERPINA1,S100A8</i>                                |
| VDR/RXR Activation                                                             | 0.001995 | 0.0897 | <i>BGLAP,TNFSF11,PRKCQ,CAMP,TRPV5,CEBPA,PRKCB</i>                                             |
| G-Protein Coupled Receptor Signaling                                           | 0.002455 | 0.0536 | <i>APLNR,RGS18,PIK3R5,FPR1,P2RY13,TULP2,ADRB1,GNA15,VIPR1,CXCR2,PIK3CG,PTH1R,P2RY12,PRKCB</i> |
| FcγRIIB Signaling in B Lymphocytes                                             | 0.002455 | 0.1020 | <i>BTK,PIK3CG,SYK,PIK3R5,INPP5D</i>                                                           |
| CXCR4 Signaling                                                                | 0.002692 | 0.0625 | <i>ELMO3,PRKCQ,PAK6,GNA15,CXCR4,PIK3CG,PIK3R5,MYL4,RHOH,PRKCB</i>                             |
| α-tocopherol Degradation                                                       | 0.003090 | 0.5000 | <i>CYP4F3,CYP4F12</i>                                                                         |
| IL-12 Signaling and Production in Macrophages                                  | 0.003388 | 0.0657 | <i>TLR2,APOE,APOB,PRKCQ,PIK3CG,PIK3R5,SERPINA1,S100A8,PRKCB</i>                               |
| TR/RXR Activation                                                              | 0.003548 | 0.0787 | <i>HP,ADRB1,NXPH2,PIK3CG,PIK3R5,PCK1,DIO3</i>                                                 |
| Role of Osteoblasts, Osteoclasts and Chondrocytes in Rheumatoid Arthritis      | 0.004365 | 0.0533 | <i>BGLAP,TNFSF11,IGF1,NGFR,PIK3CG,DLX5,PIK3R5,SFRP5,MMP13,SP7,BMP5,BMP8B</i>                  |
| Granulocyte Adhesion and Diapedesis                                            | 0.004898 | 0.0602 | <i>ITGB2,ITGAM,C5AR1,MMP28,CDH5,CXCR4,CXCR2,NGFR,MMP13,FPR1</i>                               |
| Type II Diabetes Mellitus Signaling                                            | 0.005012 | 0.0630 | <i>PRKCQ,SLC27A2,PKLR,NGFR,PIK3CG,ADIPOQ,PIK3R5,PRKCB</i>                                     |
| Role of Pattern Recognition Receptors in Recognition of Bacteria and Viruses   | 0.005129 | 0.0737 | <i>TLR2,PRKCQ,C5AR1,PIK3CG,SYK,PIK3R5,PRKCB</i>                                               |
| IL-3 Signaling                                                                 | 0.005888 | 0.0822 | <i>CSF2RB,PRKCQ,PIK3CG,PIK3R5,INPP5D,PRKCB</i>                                                |
| Complement System                                                              | 0.006026 | 0.1210 | <i>CR1,C5AR1,C7,CR2</i>                                                                       |
| Gαq Signaling                                                                  | 0.006607 | 0.0573 | <i>BTK,PRKCQ,RGS18,GNA15,PIK3CG,GPLD1,PIK3R5,RHOH,PRKCB</i>                                   |
| NF-κB Activation by Viruses                                                    | 0.006761 | 0.0759 | <i>ITGB2,PRKCQ,PIK3CG,PIK3R5,CR2,PRKCB</i>                                                    |
| T Cell Receptor Signaling                                                      | 0.006918 | 0.0686 | <i>BTK,PTPN7,PRKCQ,GRAP2,PIK3CG,PIK3R5,LCP2</i>                                               |
| iCOS-iCOSL Signaling in T Helper Cells                                         | 0.010000 | 0.0625 | <i>IL2RG,PRKCQ,GRAP2,PIK3CG,PIK3R5,INPP5D,LCP2</i>                                            |
| Clathrin-mediated Endocytosis Signaling                                        | 0.010233 | 0.0524 | <i>UBD,ITGB2,APOE,APOB,IGF1,TF,PIK3CG,PIK3R5,SERPINA1,S100A8</i>                              |
| Role of NFAT in Regulation of the Immune Response                              | 0.015849 | 0.0484 | <i>BTK,FCGR3B,PRKCQ,GNA15,PIK3CG,SYK,PIK3R5,FCGR3A,LCP2</i>                                   |
| Role of Macrophages, Fibroblasts and Endothelial Cells in Rheumatoid Arthritis | 0.016982 | 0.0418 | <i>TNFSF11,PRKCQ,C5AR1,PIK3R5,MMP13,TLR2,ROR2,NGFR,PIK3CG,CEBPA,SFRP5,FCGR3A,PRKCB</i>        |
| p70S6K Signaling                                                               | 0.019953 | 0.0574 | <i>BTK,IL2RG,PRKCQ,PIK3CG,SYK,PIK3R5,PRKCB</i>                                                |
| Macropinocytosis Signaling                                                     | 0.020417 | 0.0658 | <i>ITGB2,PRKCQ,PIK3CG,PIK3R5,PRKCB</i>                                                        |
| Glioma Signaling                                                               | 0.021878 | 0.0566 | <i>IGF2,PRKCQ,IGF1,PIK3CG,PIK3R5,PRKCB</i>                                                    |
| Melatonin Degradation III                                                      | 0.022909 | 1.0000 | <i>MPO</i>                                                                                    |
| PI3K Signaling in B Lymphocytes                                                | 0.023988 | 0.0547 | <i>BTK,PIK3CG,SYK,PIK3AP1,INPP5D,CR2,PRKCB</i>                                                |
| LPS-stimulated MAPK Signaling                                                  | 0.026915 | 0.0633 | <i>PRKCQ,PIK3CG,PIK3R5,LBP,PRKCB</i>                                                          |
| Tec Kinase Signaling                                                           | 0.026915 | 0.0457 | <i>BTK,PRKCQ,PAK6,GNA15,PIK3CG,PIK3R5,RHOH,PRKCB</i>                                          |
| Paxillin Signaling                                                             | 0.027542 | 0.0545 | <i>ITGB2,ITGA2B,ITGAM,PAK6,PIK3CG,PIK3R5</i>                                                  |
| B Cell Receptor Signaling                                                      | 0.028840 | 0.0494 | <i>BTK,PRKCQ,PIK3CG,SYK,PIK3R5,PIK3AP1,INPP5D,PRKCB</i>                                       |
| cAMP-mediated signaling                                                        | 0.028840 | 0.0459 | <i>P2RY13,TULP2,APLNR,RGS18,ADRB1,VIPR1,CXCR2,PTH1R,P2RY12,FPR1</i>                           |
| HER-2 Signaling in Breast Cancer                                               | 0.031623 | 0.0625 | <i>ITGB2,PRKCQ,PIK3CG,PIK3R5,PRKCB</i>                                                        |
| UVB-Induced MAPK Signaling                                                     | 0.031623 | 0.0741 | <i>PRKCQ,PIK3CG,PIK3R5,PRKCB</i>                                                              |
| IL-2 Signaling                                                                 | 0.033884 | 0.0714 | <i>IL2RG,PIK3CG,SYK,PIK3R5</i>                                                                |
| NF-κB Signaling                                                                | 0.034674 | 0.0473 | <i>TLR2,TNFSF11,PRKCQ,NGFR,PIK3CG,NTRK1,PIK3R5,PRKCB</i>                                      |
| Role of IL-17A in Psoriasis                                                    | 0.035481 | 0.1540 | <i>S100A9,S100A8</i>                                                                          |
| fMLP Signaling in Neutrophils                                                  | 0.038019 | 0.0504 | <i>PRKCQ,PIK3CG,PIK3R5,CYBB,PRKCB,FPR1</i>                                                    |
| TREM1 Signaling                                                                | 0.038019 | 0.0702 | <i>TLR2,TREM1,MPO,TYROBP</i>                                                                  |
| Thrombopoietin Signaling                                                       | 0.038019 | 0.0678 | <i>PRKCQ,PIK3CG,PIK3R5,PRKCB</i>                                                              |
| IL-9 Signaling                                                                 | 0.043652 | 0.0789 | <i>IL2RG,PIK3CG,PIK3R5</i>                                                                    |

|                                      |          |        |                                                      |
|--------------------------------------|----------|--------|------------------------------------------------------|
| ErbB4 Signaling                      | 0.044668 | 0.0656 | <i>PRKCQ,PIK3CG,PIK3R5,PRKCB</i>                     |
| ErbB Signaling                       | 0.046774 | 0.0575 | <i>PRKCQ,PAK6,PIK3CG,PIK3R5,PRKCB</i>                |
| CD28 Signaling in T Helper Cells     | 0.046774 | 0.0492 | <i>PRKCQ,GRAP2,PIK3CG,SYK,PIK3R5,LCP2</i>            |
| Agranulocyte Adhesion and Diapedesis | 0.048978 | 0.0455 | <i>ITGB2,C5AR1,MMP28,CDH5,CXCR4,CXCR2,MYL4,MMP13</i> |
